# Supplementary material for: Biochar prepared at different pyrolysis temperatures affects urea-nitrogen immobilization and N2O emissions in paddy fields
Source: PeerJ. 2019 Jun 4;7:e7027. doi: 10.7717/peerj.7027 (PMC6555392; doi:10.7717/peerj.7027)
Supplement: Figure S2 — Given data show mean ± SD of the B400 and B700 for each treatment. A, B400; B, B700. [file peerj-07-7027-s007.xls]

## Sheet: data
						mean	sd
B400	N0	C0	6.01	4.85	7.07	5.97667	1.11038
		C0.7	5.72	6.76	5.74	6.07333	0.594755
		C2.1	5.3	3.97	5.17	4.81333	0.733235
	N210	C0	6.65	3.51	4.81	4.99	1.57772
		C0.7	4.11	3.53	3.72	3.78667	0.295691
		C2.1	3.95	3.81	3.64	3.8	0.155242
	N168	C0	4.1	3.68	4	3.92667	0.219393
		C0.7	4.4	4.75	4.16	4.43667	0.296704
		C2.1	5.49	4.78	5	5.09	0.363456
B700	N0	C0	4.9	5.32	4.62	4.94667	0.352326
		C0.7	4.54	4.39	4.5	4.47667	0.0776745
		C2.1	4.49	5.08	4.94	4.83667	0.308275
	N210	C0	3.68	4.3	5.34	4.44	0.838809
		C0.7	3.94	3.68	4.36	3.99333	0.343123
		C2.1	3.46	3.71	3.96	3.71	0.25
	N168	C0	4.51	4.36	4.23	4.36667	0.140119
		C0.7	4.17	4.55	3.94	4.22	0.308058
		C2.1	4.53	4.76	4.04	4.44333	0.367741
