# Supplementary material for: Biochar prepared at different pyrolysis temperatures affects urea-nitrogen immobilization and N2O emissions in paddy fields
Source: PeerJ. 2019 Jun 4;7:e7027. doi: 10.7717/peerj.7027 (PMC6555392; doi:10.7717/peerj.7027)
Supplement: Figure S3 — Given data show cumulative N2O emissions mean ± SD of the B400 and B700 for each treatment. [file peerj-07-7027-s008.xls]

## Sheet: data
		2018-06-02	2018-06-19	2018-06-28	2018-07-12	2018-07-16	2018-07-23	2018-08-13	2018-08-23	2018-09-15	2018-09-25	A	B400
B400	N0C0-1	0.737646	0.0907	0.0456	0.021958	0.0316389	0.0146	0.0136381	0.0255032	0.0344	0.0161918			N0C0	N0C1	N0C2	N1C0	N1C1	N1C2	N2C0	N2C1	N2C2
	N0C0-2	0.604785	0.0953	0.0475621	0.0287214	0.0274	0.0136	0.0156725	0.0213242	0.0114687	0.0193409		2018-06-02	0.622777	0.347681	0.069731	0.755045	0.333634	0.0485079	0.864648	0.292932	0.053292
	N0C0-3	0.5259	0.1007	0.0322248	0.0224358	0.0242308	0.0107	0.0101856	0.021897	0.0572363	0.0177		2018-06-19	0.0955667	0.0256563	0.0099	0.296511	0.125967	-0.0307333	0.278726	0.0452	0.158224
	N0C1-1	0.396738	0.0242749	0.141352	0.0689169	0.0238587	0.0433185	0.00367202	0.0462991	-0.0231432	0.0201		2018-06-28	0.0417956	0.124979	0.2236	0.172191	0.165486	-0.0969959	0.149741	0.144354	0.127929
	N0C1-2	0.290805	0.0268941	0.124001	0.0403654	0.0422494	0.0319877	0.00846653	0.0352	-0.00912587	0.0192779		2018-07-12	0.0243717	0.0547941	0.0352756	0.0676667	0.0462579	0.0742297	0.0647657	0.0627414	0.0278822
	N0C1-3	0.3555	0.0258	0.109584	0.0551	0.0391257	0.057783	0.0067	0.0311642	-0.0161012	0.0192		2018-07-16	0.0277566	0.0350779	0.0221744	0.0573938	0.0598938	0.116225	0.0339042	0.0307997	0.0452595
	N0C2-1	0.0731384	0.0099	0.2132	0.0356	0.0218	0.0527568	0.0258015	-0.0069	-0.0256	0.018092		2018-07-23	0.0129667	0.0443631	0.0693772	0.103797	0.034611	0.106706	0.024518	0.0154629	0.017
	N0C2-2	0.0466024	0.0108	0.2281	0.033625	0.0238195	0.0866748	0.0244	-0.00822159	-0.0331789	0.0202		2018-08-13	0.0131654	0.00627952	0.0247337	0.00713333	0.0482891	0.047638	0.0389919	0.0263253	0.0140333
	N0C2-3	0.0894521	0.009	0.2295	0.0366018	0.0209037	0.0687	0.0239995	-0.00431474	-0.0218576	0.0225954		2018-08-23	0.0229081	0.0375544	-0.00647878	0.0125742	-0.00670788	0.0209214	0.0161	0.0283801	-0.0154523
	N1C0-1	0.747186	0.3032	0.198765	0.0713	0.0582	0.1069	0.0074	0.0126	0.0169701	0.0441168		2018-09-15	0.0343683	-0.0161234	-0.0268788	0.0135038	0.0237984	0.0092768	-0.0256771	0.0135376	0.0331529
	N1C0-2	0.7316	0.2937	0.143701	0.0663	0.0566	0.0970933	0.0071	0.0159316	0.0138	0.0329		2018-09-25	0.0177442	0.019526	0.0202958	0.0379136	-0.0116333	0.0105938	0.024079	0.0275107	0.0377396
	N1C0-3	0.786349	0.292634	0.174107	0.0654	0.0573814	0.107398	0.0069	0.009191	0.00974134	0.036724	B	B700
	N1C1-1	0.311438	0.1242	0.165637	0.0467	0.0692691	0.0343	0.0471474	-0.00690658	0.0237	-0.0116			N0C0	N0C1	N0C2	N1C0	N1C1	N1C2	N2C0	N2C1	N2C2
	N1C1-2	0.358964	0.1241	0.175916	0.0433387	0.0505123	0.0335406	0.0493199	-0.0067	0.0219565	-0.0125		2018-06-02	0.462287	0.251727	0.0837769	0.912182	0.199833	0.0595891	0.632522	0.3646	0.1175
	N1C1-3	0.3305	0.1296	0.154906	0.0487351	0.0599	0.0359923	0.0484	-0.00651706	0.0257388	-0.0108		2018-06-19	0.376982	0.0285	0.0312386	0.277935	0.0590545	0.043	0.305088	0.184233	0.139352
	N1C2-1	0.0437592	-0.0245	-0.110285	0.0647	0.11962	0.108623	0.0510277	0.0207778	0.0123617	0.0134121		2018-06-28	0.16767	0.0686546	0.0469467	-0.250255	0.0719751	-0.0490109	0.183596	0.212885	0.050343
	N1C2-2	0.0464002	-0.0278	-0.0792249	0.0850602	0.106069	0.104095	0.0446861	0.0242399	0.00627585	0.0105		2018-07-12	0.0289466	0.0234915	0.0458754	0.0462111	0.0844	0.0453123	0.0371855	0.0253927	0.0165
	N1C2-3	0.0553643	-0.0399	-0.101478	0.0729288	0.122987	0.1074	0.0472	0.0177465	0.00919282	0.00786938		2018-07-16	0.0450341	0.0419709	0.0281272	0.0580058	0.118829	0.109565	0.045737	0.0370668	0.0461688
	N2C0-1	0.851548	0.2768	0.1509	0.0649	0.0421864	0.011469	0.0395118	0.0167	-0.025	0.0232077		2018-07-23	-0.0627764	0.0448003	0.0358632	0.057553	0.0520573	0.0439807	0.0223333	0.0373723	0.0571104
	N2C0-2	0.966937	0.2708	0.152081	0.0614971	0.0383335	0.0279694	0.0383638	0.0155	-0.0224847	0.0241		2018-08-13	0.0245421	0.0162365	0.00993199	0.0156586	0.0610962	0.0355401	0.0162621	0.0214402	0.0245294
	N2C0-3	0.775458	0.288577	0.146243	0.0679	0.0211927	0.0341155	0.0391	0.0161	-0.0295465	0.0249293		2018-08-23	-0.0230953	-0.00635002	-0.016956	0.0194963	0.0288431	-0.00725018	-0.0162695	-0.0144731	-0.0130926
	N2C1-1	0.303025	0.0527	0.14156	0.0711171	0.030199	0.0155	0.0165183	0.0296	0.0138	0.025243		2018-09-15	-0.0225974	-0.0526551	0.0299836	0.0249248	0.0255242	0.0102242	-0.00704824	0.00420302	0.019314
	N2C1-2	0.2945	0.0411	0.149602	0.0614	0.0343	0.0116163	0.0384628	0.0316471	0.0149608	0.029589		2018-09-25	0.0357015	0.0151041	0.0197753	-0.0306628	0.0252474	0.0287201	0.0445551	0.069449	0.0221144
	N2C1-3	0.28127	0.0418	0.1419	0.0557072	0.0279	0.0192723	0.0239947	0.0238932	0.0118521	0.0277
	N2C2-1	0.0520854	0.1575	0.1299	0.0212035	0.0487404	0.017	0.0142	-0.0146501	0.0322587	0.0494496
	N2C2-2	0.0545906	0.157672	0.120327	0.0301432	0.0418251	0.0163	0.0129	-0.0152457	0.0395	0.0329689
	N2C2-3	0.0532	0.1595	0.133561	0.0323	0.0452129	0.0177	0.015	-0.016461	0.0277	0.0308002		N1=N210
													N2=N168
B700	N0C0-1	0.429284	0.3897	0.195946	0.0221406	0.0583945	-0.0599	0.0224264	-0.0165228	-0.022494	0.0357		C1=C0.7
	N0C0-2	0.542185	0.359545	0.1678	0.0295	0.0463413	-0.0657	0.0248	-0.0319251	-0.0175717	0.0139817		C2=C2.1
	N0C0-3	0.415392	0.3817	0.139264	0.0351991	0.0303665	-0.0627293	0.0264	-0.0208381	-0.0277267	0.0574229
	N0C1-1	0.288576	0.029	0.0949662	0.0234	0.0422446	0.0405688	0.0157	-0.00432745	-0.0257486	0.0169334
	N0C1-2	0.198214	0.0277	0.0680724	0.0249315	0.0535356	0.0489322	0.0163	-0.00832262	-0.0168	0.0149431
	N0C1-3	0.26839	0.0288	0.0429251	0.0221431	0.0301323	0.0449	0.0167095	-0.0064	-0.115417	0.0134359
	N0C2-1	0.0903393	0.0323618	0.0440527	0.039506	0.0393757	0.0358895	0.00691672	-0.0168	0.0246485	0.0199327
	N0C2-2	0.0727915	0.0314	0.0493873	0.0524155	0.0210059	0.0335	0.0129793	-0.0184073	0.0330022	0.0166329
	N0C2-3	0.0882	0.029954	0.0474	0.0457047	0.024	0.0382	0.0099	-0.0156608	0.0323	0.0227604
	N1C0-1	0.918807	0.2771	-0.249771	0.0484	0.0599153	0.0595511	0.0158	0.0195	0.026163	-0.0307
	N1C0-2	0.93194	0.283051	-0.239087	0.0432	0.0573	0.0562	0.016	0.0200954	0.0162646	-0.0317545
	N1C0-3	0.8858	0.273654	-0.261909	0.0470332	0.0568022	0.0569079	0.0151759	0.0188935	0.0323468	-0.0295338
	N1C1-1	0.1906	0.0533583	0.0808508	0.0855	0.1174	0.0515	0.0672037	0.0282	0.0170953	0.0288616
	N1C1-2	0.2097	0.0620051	0.0619405	0.0823	0.134418	0.053072	0.0625	0.0292	0.0377848	0.0251
	N1C1-3	0.1992	0.0618	0.0731338	0.0854	0.10467	0.0516	0.053585	0.0291294	0.0216926	0.0217807
	N1C2-1	0.0544	0.0403	-0.048177	0.0418	0.1067	0.0428017	0.0411232	-0.00735611	0.0147762	0.0277466
	N1C2-2	0.0346356	0.0479	-0.031537	0.0564832	0.11758	0.0481406	0.038018	-0.00709443	0.00568159	0.0289
	N1C2-3	0.0897315	0.0408	-0.0673186	0.0376538	0.104416	0.041	0.0274791	-0.0073	0.0102147	0.0295138
	N2C0-1	0.653099	0.319229	0.1842	0.0277179	0.0387745	0.0126765	0.0137	-0.0148773	-0.00683331	0.0397843
	N2C0-2	0.6303	0.293834	0.171983	0.0395	0.0513183	0.0315242	0.0226807	-0.0174311	-0.00672404	0.0439767
	N2C0-3	0.614166	0.3022	0.194606	0.0443387	0.0471181	0.0227992	0.0124055	-0.0165	-0.00758737	0.0499043
	N2C1-1	0.3635	0.1828	0.2155	0.0251	0.0308337	0.0356	0.0201284	-0.0145	0.00477853	0.0768
	N2C1-2	0.379871	0.1883	0.216042	0.0307148	0.0422668	0.0483327	0.0229921	-0.00741643	0.0042	0.0705471
	N2C1-3	0.35043	0.1816	0.207114	0.0203634	0.0381	0.0281844	0.0212	-0.0215029	0.00363054	0.061
	N2C2-1	0.114452	0.121854	0.0512	0.0169	0.0541165	0.0541	0.0232373	-0.0121672	0.0184891	0.0199919
	N2C2-2	0.1192	0.150092	0.0588535	0.0165	0.045827	0.0660055	0.0241	-0.0133	0.0199675	0.0222
	N2C2-3	0.118848	0.146109	0.0409755	0.0161	0.038563	0.0512258	0.0262509	-0.0138106	0.0194854	0.0241513
