# Supplementary material for: Biochar prepared at different pyrolysis temperatures affects urea-nitrogen immobilization and N2O emissions in paddy fields
Source: PeerJ. 2019 Jun 4;7:e7027. doi: 10.7717/peerj.7027 (PMC6555392; doi:10.7717/peerj.7027)
Supplement: Table S5 — Given data show mean ± SD of the B400 and B700 for each treatment. A, B400; B, B700. [file peerj-07-7027-s005.xls]

## Sheet: data
	Dry matter					mean	sd								mean	sd			EF
B400	N0	C0	51.93	46.34	47.64	48.6367	2.92524		B400	N0	C0	20.15	18.73	20.29	19.7233	0.863095								mean	sd
		C0.7	53.04	47.69	54.79	51.84	3.69899				C0.7	21.6	20.46	23.96	22.0067	1.78509		B400	N210	C0	0.647328	0.688035	0.797765	0.711043	0.0778125
		C2.1	55.2	51.83	53.29	53.44	1.69				C2.1	25.28	24.11	25.51	24.9667	0.750755				C0.7	0.200059	0.362938	0.26156	0.274852	0.082249
	N210	C0	210.07	193.65	205.11	202.943	8.42169			N210	C0	101.37	96.27	98.21	98.6167	2.57421				C2.1	0.147378	0.0666994	0.0424848	0.0855209	0.0549214
		C0.7	172.83	166.76	183.91	174.5	8.69611				C0.7	90.86	80.58	88.97	86.8033	5.47179			N168	C0	0.574063	0.936745	0.749999	0.753602	0.181368
		C2.1	195.81	153.62	128.01	159.147	34.2362				C2.1	90.2	82.69	68.14	80.3433	11.2157				C0.7	0.0654762	0.240196	0.0599362	0.121869	0.102511
	N168	C0	174.84	172.53	158.11	168.493	9.0661			N168	C0	86.11	90.06	81.56	85.91	4.25353				C2.1	0.148481	0.107157	0.0557569	0.103798	0.046453
		C0.7	170.28	155.61	153.25	159.713	9.22677				C0.7	85.85	72.55	78.9	79.1	6.65226		B700	N210	C0	0.115342	0.121647	0.166222	0.134404	0.0277351
		C2.1	174	129.82	150.34	151.387	22.1086				C2.1	85.77	68.89	69.49	74.7167	9.57717				C0.7	0.290075	0.42865	0.532569	0.417098	0.121659
B700	N0	C0	61.35	47.16	51.53	53.3467	7.26734		B700	N0	C0	26.28	18.86	19.37	21.5033	4.14457				C2.1	0.128655	0.100389	0.123661	0.117569	0.0150856
		C0.7	46.68	48.15	46.3	47.0433	0.977053				C0.7	19.25	18.97	18.93	19.05	0.174356			N168	C0	0.294645	0.288307	0.405403	0.329452	0.0658524
		C2.1	52.44	49.61	39.54	47.1967	6.78016				C2.1	22.91	23.07	14.83	20.27	4.71186				C0.7	0.619266	0.821406	0.867316	0.769329	0.131971
	N210	C0	208.88	188.31	211.01	202.733	12.5363			N210	C0	98.88	91.02	101.16	97.02	5.31974				C2.1	0.244937	0.322275	0.237487	0.268233	0.0469498
		C0.7	173.74	175.2	173.12	174.02	1.0679				C0.7	78.44	86.96	85.44	83.6133	4.54424
		C2.1	125.09	206.26	188.34	173.23	42.6424				C2.1	64.94	106.37	94.87	88.7267	21.3873
	N168	C0	180.94	164.97	207.52	184.477	21.4943			N168	C0	90.8	79.04	103.18	91.0067	12.0713
		C0.7	177.2	162.78	173.39	171.123	7.47244				C0.7	85.37	81.34	86.64	84.45	2.76718
		C2.1	188.84	146.38	127.25	154.157	31.5228				C2.1	92.43	75.83	63.69	77.3167	14.4276
	Inter-agent effect test									Inter-agent effect test									Inter-agent effect test
	Dependent variable:	干物质								Dependent variable:	干物质								Dependent variable:	干物质
	Source	Type III sums of squares	df	r2	F	p				Source	Type III sums of squares	df	r2	F	p				Source	Type III sums of squares	df	r2	F	p
	Correction Model	191136.416a	19	10059.8	33.0349	1.47618e-16				Correction Model	51699.342a	19	2721.02	38.9852	1.07612e-17				Correction Model	.000a	13	1.81019e-05	25.8242	2.5796e-10
	Intercept	942026	1	942026	3093.47	5.65063e-35				Intercept	222393	1	222393	3186.32	3.43595e-35				Intercept	0.000417542	1	0.000417542	595.665	2.00157e-17
	Repetition	821.956	2	410.978	1.34959	0.272887				Repetition	83.381	2	41.6905	0.597318	0.555957				Repetition	4.80901e-06	2	2.40451e-06	3.43026	0.0505013
	C	3877.46	2	1938.73	6.36651	0.00448268				C	638.006	2	319.003	4.57049	0.0174586				C	7.41757e-05	2	3.70878e-05	52.9095	3.92738e-09
	N	183153	2	91576.7	300.724	2.41421e-22				N	50194.6	2	25097.3	359.58	1.34294e-23				N	9.17475e-06	1	9.17475e-06	13.0887	0.00152453
	tem	230.971	1	230.971	0.758474	0.389915				tem	19.3321	1	19.3321	0.27698	0.602104				tem	5.32973e-09	1	5.32973e-09	0.00760339	0.931303
	C * N	2269.44	4	567.36	1.86313	0.139609				C * N	515.851	4	128.963	1.84771	0.142454				C * N	1.77622e-07	2	8.8811e-08	0.126698	0.881638
	C * tem	53.9076	2	26.9538	0.0885123	0.915502				C * tem	14.6855	2	7.34274	0.105203	0.900434				C * tem	0.000124781	2	6.23906e-05	89.0064	2.85112e-11
	N * tem	333.668	2	166.834	0.547858	0.583206				N * tem	89.4916	2	44.7458	0.641093	0.532965				N * tem	1.5606e-05	1	1.5606e-05	22.2636	0.000104404
	C * N * tem	395.625	4	98.9062	0.324793	0.859368				C * N * tem	143.991	4	35.9976	0.515754	0.724609				C * N * tem	6.59548e-06	2	3.29774e-06	4.70455	0.0199085
	error	10353.7	34	304.52						error	2373.07	34	69.7961						error	1.54213e-05	22	7.00968e-07
	total	1.14352e+06	54							total	276465	54							total	0.000668289	36
	Revised total	201490	53							Revised total	54072.4	53							Revised total	0.000250746	35
	a. R2 = .949（adjusted R2= .920）									a. R2 = .956（adjusted R2 = .932）									a. R2 = .938（adjusted R2 = .902）
